# Supplementary material
Source: PubMed Central journal article supplement (PMC4041658)

## JID-2013-0436 Supplementary Material

### Supplemental Figure Legends

**S1a.** Range of expression levels of CRD-BP,  $\beta$ -TrCP1, c-myc, TCF1, AXIN, PTCH1, and PTCH2 in mRNA isolated from 10 BCCs and 10 unmatched normal skin samples determined by quantitative RT-PCR. The BCCs were collected from discarded tissues of BCC patients during MOHS surgery and the controls were the clear margin skin obtained in the course of MOHS surgery at the University of Alabama Birmingham clinic.

**S1b.** Immunofluorescence showing the expression of CRD-BP in two superficial and one micro-nodular BCC samples. Scale bar = 30  $\mu$ m.

**S1c.** Level of ectopically expressed CRD-BP in keratinocytes in comparison to the range of endogenous CRD-BP expression in BCCs.

**S2a.** Karyotyping results of UW-BCC1 at passages 6 and 29. This karyotyping was performed at the WiCell Research Institute and shows an abnormal near triploid karyotype with complex structural and numerical aberrations both at the 6th and the 29th passages.

**S2b.** Tumor sizes in nude mice induced by UW-BCC1 sc injection with matrigel (left) and without matrigel (right) at 3 and 4 weeks post injection. 5 million cells were used for each injection. The individual symbols represent individual experiments, each done under the same conditions.

**S2c.** H&E staining of a tumor section induced by UW-BCC1 injection in nude mice. Scale bar = 30  $\mu$ m.

**S2d.** Relative expression of CRD-BP,  $\beta$ -TrCP1, c-myc, GLI1, PTCH1, and PTCH2 in mRNA isolated from individual xenografts induced by UW-BCC1 in nude mice determined by quantitative RT-PCR. t1 - t4 or t5 are individual xenografts induced by UW-BCC1 cell line, UW-BCC1 is the in vitro cultured cells, and normal human epidermal keratinocytes (NHEK) represent the control cultured cells.

**S2e.** Protein expression of CRD-BP, K5 and K14 in tumors induced by UW-BCC1 in nude mice determined by immunoblot analyses.  $\beta$ -actin was used as an internal control.

**S2f.** Protein expression of CRD-BP, GLI1, K5 and K14 in tumors induced by UW-BCC1 in nude mice determined by immunoblot analyses.  $\beta$ -actin was used as an internal control.

**S2g.** Immunofluorescence showing CRD-BP expression in a tumor induced by UW-BCC1 injection in nude mice. Scale bar = 30  $\mu$ m.

**S3.** Immunofluorescence showing the expression of CRD-BP in cultured UW-BCC1 and NHEK. Scale bar = 30  $\mu$ m.

**JID-2013-0436 Supplementary Table.** Sequence of primers used for RT-qPCR

| Targets       | Forward                  | Reverse                    |
|---------------|--------------------------|----------------------------|
| CRD-BP        | 5'CTGAAGATCCTGGCCCATAA3' | 5'AAGGTCTTGCAACGAGGAGA3'   |
| GLI1          | 5'GTGCAAGTCAAGCCAGAACA3' | 5'ATAGGGGCCTGACTGGAGAT3'   |
| $\beta$ TrCP1 | 5'TCGTGCAAGAGAAGGCACTC3' | 5' GCAAGTTTTGTTTTGGCCAC 3' |
| c-myc         | 5'TACCCTCTCAACGACAGCAG3' | 5'TCTTGACATTCTCCTCGGTG3'   |
| TCF1(TCF7)    | 5'TGCAGCTATACCCAGGCTGG3' | 5'CCTCGACCGCCTCTTCTTC3'    |
| AXIN2         | 5'TCACCAAACCCATGTCTGTC3' | 5'TCCAGGAAAGTTCGGAACAG3'   |
| GAPDH         | 5'ATGGTTGCCACTGGGGATCT3' | 5'TGCCAAAGCCTAGGGGAAGA3'   |

JID-2013-0436 Supplemental Figure 1a

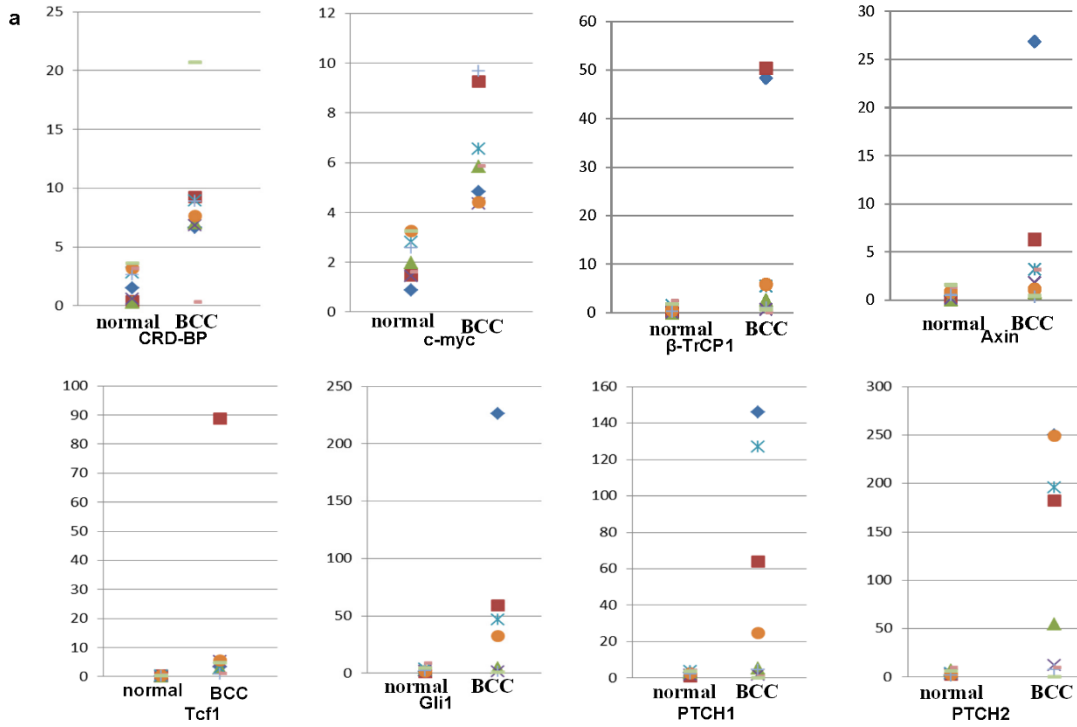

JID-2013-0436 Supplemental Figure 1b

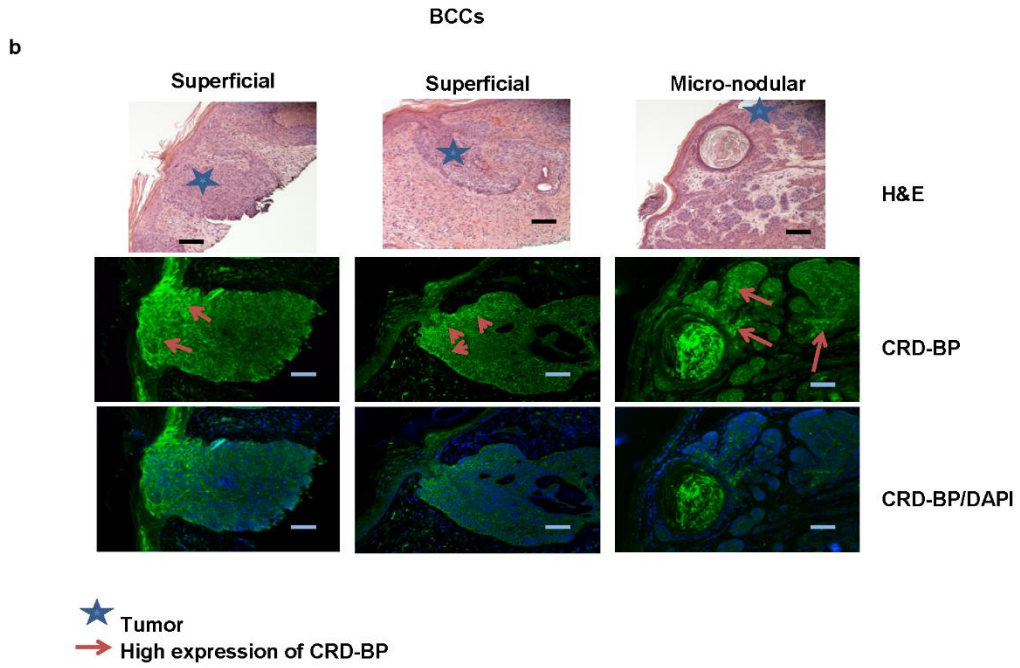

JID-2013-0436 Supplemental Figure 1c

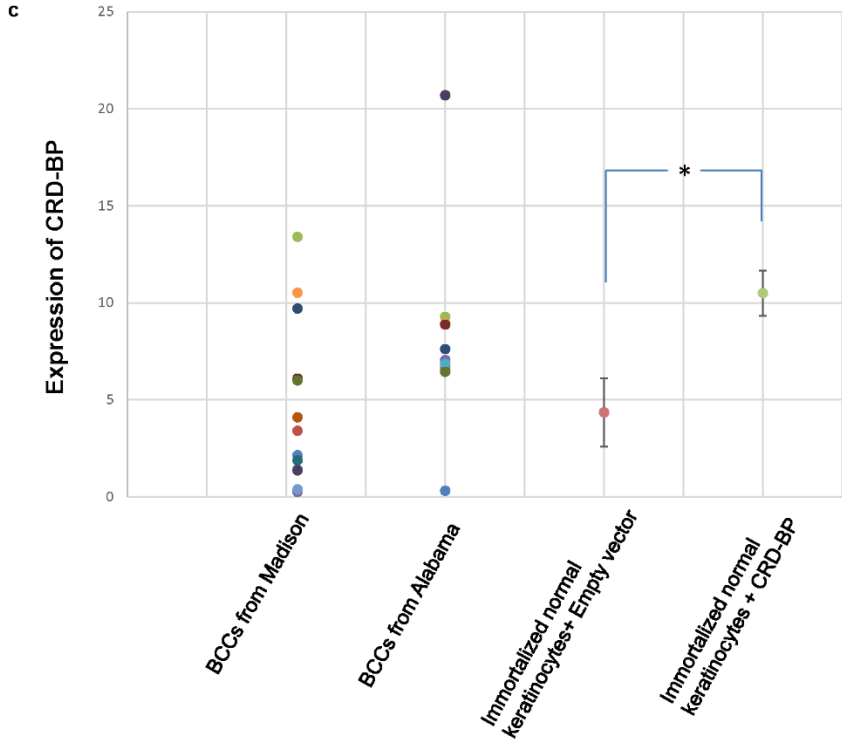

JID-2013-0436 Supplemental Figure 2a

**a**

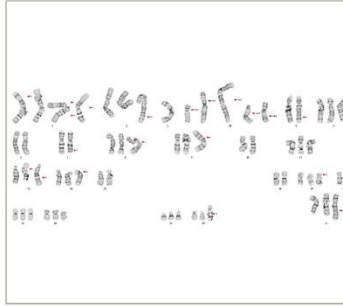

**UW-BCC1 passage 6**

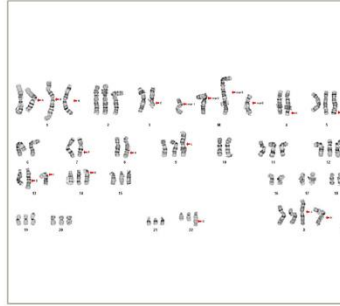

**UW-BCC1 passage 39**

JID-2013-0436 Supplemental Figure 2b-c

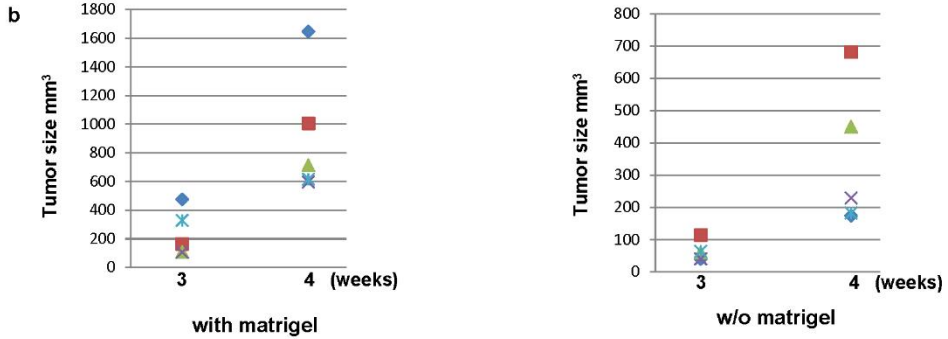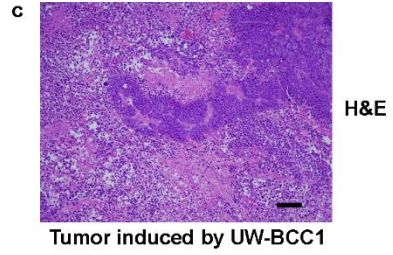



JID-2013-0436 Supplemental Figure 2d

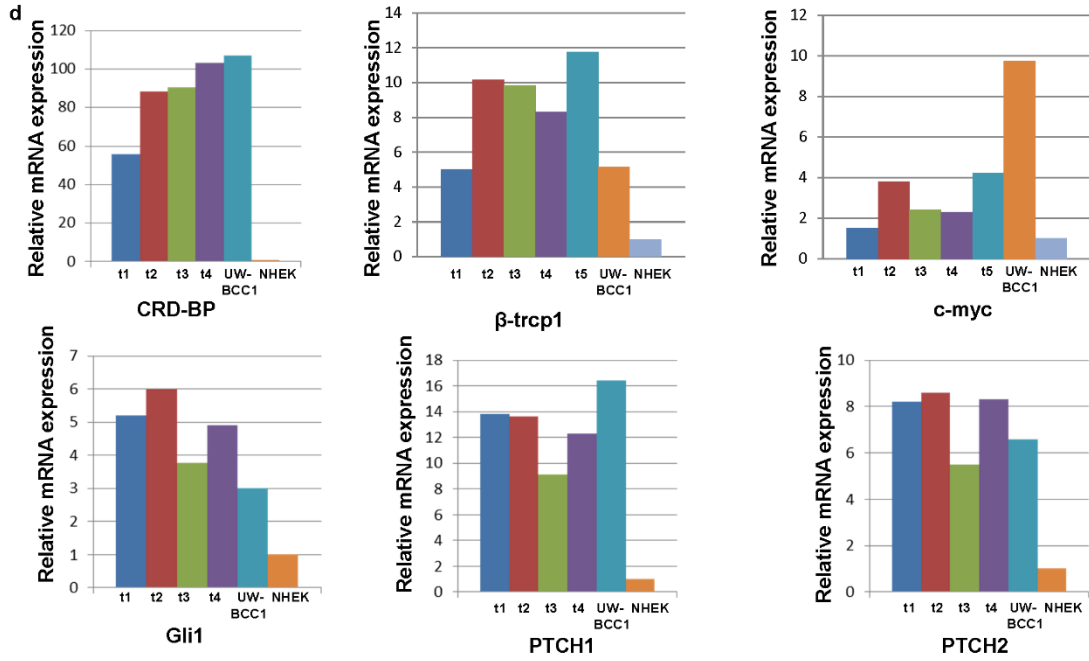

JID-2013-0436 Supplemental Figure 2e-g

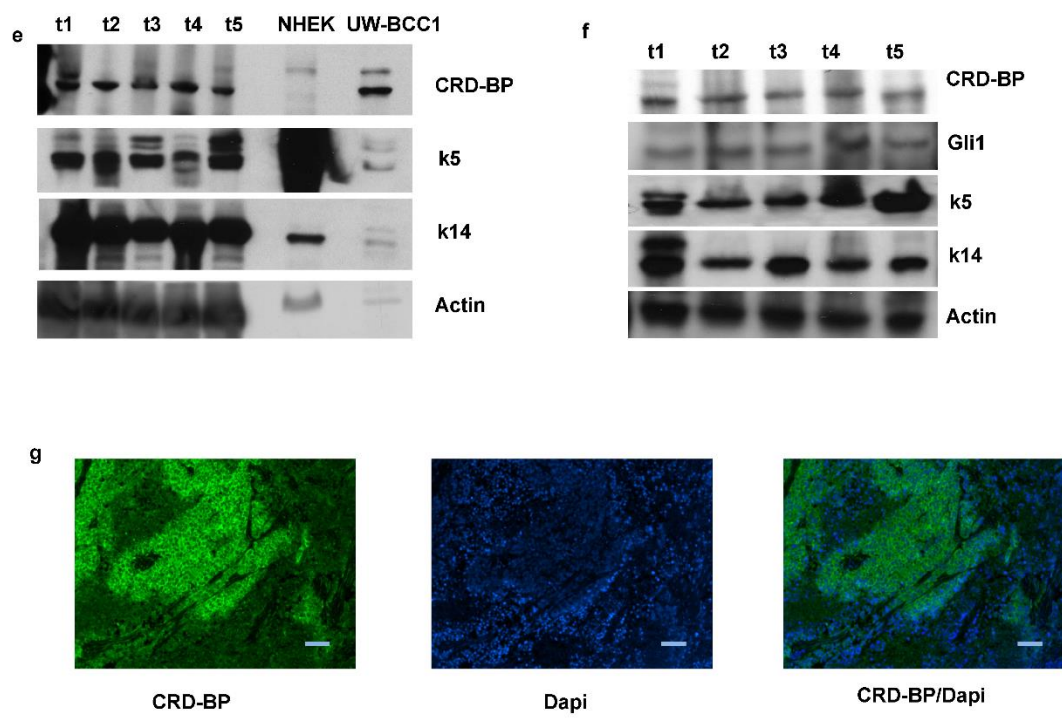

JID-2013-0436 Supplemental Figure 3

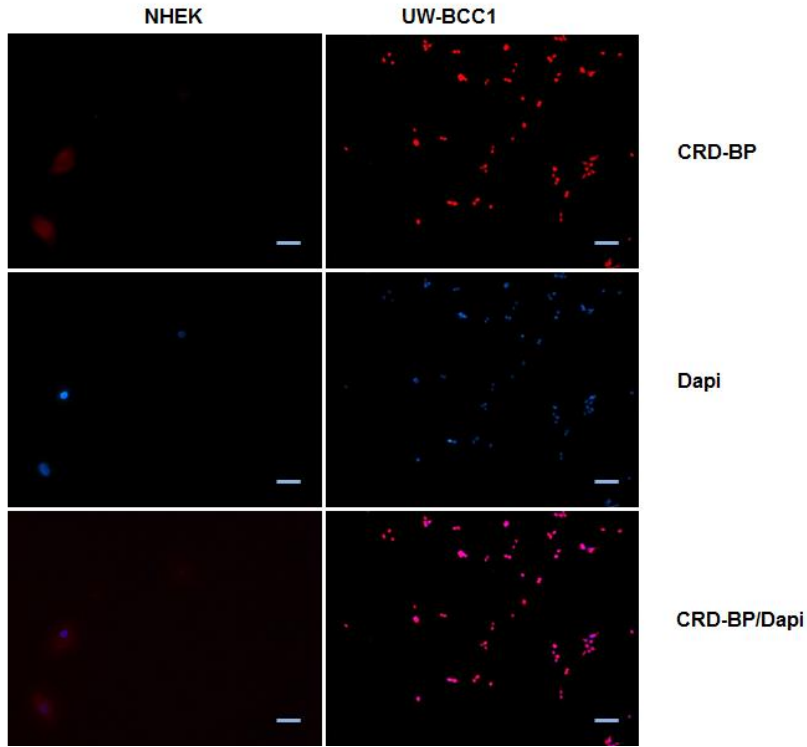

Supplement: NIHMS555404-supplement-supplement_1.pdf [file NIHMS555404-supplement-supplement_1.pdf]
